# Supplementary material for: Effects of Nutrients and Growth Regulators on Seed Germination and Development of Juvenile Rhizome Proliferation of Gastrodia elata In Vitro
Source: MDPI journal article supplement (doi:10.3390/agriculture12081210), 2022-08-12
Supplement: s1 [file s1]

# Supporting Information

**Table S1.** The effect of different carbohydrate, protein, and organic additives on the germination of 15, 18 and 20-day-old *G. elata* seeds for one month.

| Medium Code | Va | Y(g/L) | Gc(g/L) | S (g/L) | Other Ingredient     | Germination |
|-------------|----|--------|---------|---------|----------------------|-------------|
| Va          | Va |        |         |         | -                    | -           |
| VGc20       | Va |        | 20      |         | -                    | -           |
| VGc30       | Va |        | 30      |         | -                    | -           |
| VS20        | Va |        |         | 20      | -                    | -           |
| VS30        | Va |        |         | 30      | -                    | +           |
| VGcS10      | Va |        | 10      | 10      | -                    | -           |
| VCW100      | Va |        | 10      | 10      | 100 mL/L CW(25 DAP)  | +           |
| VCW150      | Va |        | 10      | 10      | 150 mL/L CW          | -           |
| VCW200      | Va |        | 10      | 10      | 200 mL/L CW(20DAP)   | +           |
| VHGc20      | Va |        | 20      |         | 100 mg/L humic acid  | -           |
| VHGc30      | Va |        | 30      |         | 100 mg/L humic acid  | -           |
| Y2          |    | 2      | 10      | 10      | -                    | +           |
| Y2A         |    | 2      | 10      | 10      | 20 g/L apple puree   | +           |
| Y2H         |    | 2      | 10      | 10      | 100 mg/L humic acid  | +           |
| Y2L         |    | 2      | 10      | 10      | 2 g/L bee larva      | +           |
| Y2MSG       |    | 2      | 10      | 10      | 2 g/L Na-glutamate   | +           |
| Y2Pp        |    | 2      | 10      | 10      | 2 g/L peptone        | +           |
| Y2Pt        |    | 2      | 10      | 10      | 20 g/L mashed potato | +           |
| Y2CW150     |    | 2      | 10      | 10      | 150 mL/L CW          | -           |
| Y3          |    | 3      | 10      | 10      | -                    | +           |
| Y3A         |    | 3      | 10      | 10      | 20 g/L apple puree   | +           |
| Y3H         |    | 3      | 10      | 10      | 100 mg/L humic acid  | +           |
| Y3L         |    | 3      | 10      | 10      | 2 g/L bee larva      | +           |
| Y3MSG       |    | 3      | 10      | 10      | 2 g/L Na-glutamate   | +           |
| Y3Pp        |    | 3      | 10      | 10      | 2 g/L peptone        | +           |
| Y3Pt        |    | 3      | 10      | 10      | 20 g/L mashed potato | +           |
| Y3CW150     |    | 3      | 10      | 10      | 150 mL/L CW          | -           |

D nutrient: 100 mg/L inositol + 0.3 g/L B complex\* + 2 g/L charcoal + 8 g/L agar, pH 5.2. Va: V (Vacin & Went, 1949)+D nutrient. Y: Hyponex 7-6-19 + D nutrient. Gc: glucose; S: sucrose; CW: coconut water. No growth regulators were added in these tests.

**Table S2.** Effect of IAA, GA<sub>3</sub> or 2iP and coconut water in medium on the germination of 20-day-old *G. elata* seeds for one month.

| Medium Code | Medium | Agar (g/L) | Growth Regulator            | Germination |
|-------------|--------|------------|-----------------------------|-------------|
| YH          | YH     | 8          | -                           | -           |
| YHG 0.5     | YH     | 8          | 0.5 mg/L GA <sub>3</sub>    | -           |
| YHG 1       | YH     | 8          | 1 mg/L GA <sub>3</sub>      | -           |
| YHG 2       | YH     | 8          | 2 mg/L GA <sub>3</sub>      | -           |
| YHI 0.2     | YH     | 8          | 0.2 mg/L IAA                | -           |
| YHI 0.5     | YH     | 8          | 0.5 mg/L IAA                | +           |
| YHI 1       | YH     | 8          | 1 mg/L IAA                  | +           |
| YHI 2       | YH     | 8          | 2 mg/L IAA                  | +           |
| YP 0.1      | YH     | 8          | 0.1 mg/L 2iP                | -           |
| YP 0.2      | YH     | 8          | 0.2 mg/L 2iP                | -           |
| YIPa        | YH     | 8          | 0.5 mg/L IAA + 0.1 mg/L 2iP | -           |
| YIPb        | YH     | 8          | 2.0 mg/L IAA + 0.2 mg/L 2iP | +           |
| YCW         | YH     | 8          | 150 mL/L CW                 | -           |
| YCWa        | YH     | 6          | 150 mL/L CW                 | -           |

Basal medium YH: 2 g/L Y + D nutrient + 10 mg/L humic acid + 10 g/L glucose + 10 g/L sucrose. IAA: indole-3-acetic acid; GA<sub>3</sub>: gibberellic acid; 2iP: N<sup>6</sup>-Δ<sup>2</sup>-isopentyl-adenine CW: coconut water. +: germination; -: no germination.

**Table S3.** Effect of combination of IAA and 2iP in medium on the germination of 21 and 22-day-old *G. elata* seeds for one month.

| Medium Code | Basal Medium | Growth Regulator            | Germination |
|-------------|--------------|-----------------------------|-------------|
| VH          | VH           | -                           | -           |
| VI0.5       | VH           | 0.5 mg/L IAA                | +           |
| VI1         | VH           | 1 mg/L IAA                  | +           |
| VI2         | VH           | 2 mg/L IAA                  | +           |
| VP0.2       | VH           | 0.2 mg/L 2iP                | -           |
| VP0.4       | VH           | 0.4 mg/L 2iP                | -           |
| VIPc        | VH           | 0.5 mg/L IAA + 0.2 mg/L 2iP | -           |
| VIPd        | VH           | 1 mg/L IAA + 0.2 mg/L 2iP   | -           |
| VIPe        | VH           | 2 mg/L IAA + 0.2 mg/L 2iP   | -           |
| VIPf        | VH           | 0.5 mg/L IAA + 0.4 mg/L 2iP | -           |
| VIPg        | VH           | 1 mg/L IAA + 0.4 mg/L 2iP   | -           |
| VIPh        | VH           | 2 mg/L IAA + 0.4 mg/L 2iP   | -           |

VH: V + D nutrient + 10 mg/L humic acid + 10 g/L glucose + 10 g/L sucrose. IAA: indole-3-acetic acid; 2iP: N<sup>6</sup>-Δ<sup>2</sup>-isopentyl-adenine. +: germination; -: no germination.

**Table S4.** The effect of combination of IAA and GA<sub>3</sub> in medium on the germination of 22 -day-old *G. elata* seeds for one month.

| Medium Code | Basal Medium | Growth Regulator                        | Germination |
|-------------|--------------|-----------------------------------------|-------------|
| YH          | YH           | -                                       | +           |
| YIG1        | YH           | 0.5 mg/L IAA + 0.5 mg/L GA <sub>3</sub> | +           |
| YIG2        | YH           | 1 mg/L IAA + 0.5 mg/L GA <sub>3</sub>   | +           |
| YIG3        | YH           | 2 mg/L IAA + 0.5 mg/L GA <sub>3</sub>   | +           |
| YIG4        | YH           | 0.5 mg/L IAA + 1 mg/L GA <sub>3</sub>   | +           |
| YIG5        | YH           | 1 mg/L IAA + 1 mg/L GA <sub>3</sub>     | +           |
| YIG6        | YH           | 2 mg/L IAA + 1 mg/L GA <sub>3</sub>     | +           |

Basal medium YH: 2 g/L Y + D nutrient + 10 mg/L humic acid + 10 g/L glucose + 10 g/L sucrose. IAA: indole-3-acetic acid; GA<sub>3</sub>: gibberellic acid. +: germination; -: no germination. Seeds collected at 22 DAP.

**Table S5.** The effect of combination of GA<sub>3</sub> and 2iP in medium on the germination of 23 or 24-day-old *G. elata* seeds for one month.

| Medium Code | Basal Medium | Other Ingredient                        | Germination |
|-------------|--------------|-----------------------------------------|-------------|
| VGP1        | VHb          | 0.5 mg/L GA <sub>3</sub> + 0.2 mg/L 2iP | -           |
| VGP2        | VHb          | 1 mg/L GA <sub>3</sub> + 0.2 mg/L 2iP   | -           |
| VGP3        | VHb          | 2 mg/L GA <sub>3</sub> + 0.2 mg/L 2iP   | -           |
| VGP4        | VHb          | 0.5 mg/L GA <sub>3</sub> + 0.4 mg/L 2iP | -           |
| VGP5        | VHb          | 1 mg/L GA <sub>3</sub> + 0.4 mg/L 2iP   | -           |
| VGP6        | VHb          | 2 mg/L GA <sub>3</sub> + 0.4 mg/L 2iP   | -           |

Basal medium VHb: VH + 2 mg/L B6. GA<sub>3</sub>: gibberellic acid; 2iP: N<sup>6</sup>-Δ<sup>2</sup>-isopentyl-adenine. +: germination; -: no germination.

**Table S6.** Effect of different cytokinin on growth and proliferation of *G. elata* juvenile rhizomes in culture medium.

| Medium Code | Basal Medium | Other Ingredient |
|-------------|--------------|------------------|
| YH1         | YH1          | -                |
| BA          | YH1          | 1 mg/L BA        |
| 2iP         | YH1          | 1 mg/L2iP        |
| TDZ         | YH1          | 1 mg/L TDZ       |
| Kinetin     | YH1          | 1 mg/L Kinetin   |
| CPPU 1      | YH1          | 1 mg/L CPPU      |
| CPPU 2      | YH1          | 2 mg/L CPPU      |
| CPPU 4      | YH1          | 4 mg/L CPPU      |

Basal medium YH1: 2 g/L Y + E nutrient. BA: benzyl adenine; 2iP:N<sup>6</sup>-Δ2isopentenyl-adenine; TDZ: thidiazuron; kinetin: (N<sup>6</sup>-furfuryladenine); CPPU: N-phenyl-N'-[2-chloro- 4-pyridyl]urea.

**Table S7.** Growth and proliferation of *G. elata* juvenile rhizomes on media with various nitrogen source, amino acid and vitamin.

| Medium Code | Medium | Other Ingredient         |
|-------------|--------|--------------------------|
| CH          | YH2    | 1 g/L casein hydrolysate |
| ME          | YH2    | 1 g/L malt extract       |
| Pep         | YH2    | 1 g/L peptone            |
| Try         | YH2    | 1 g/L tryptone           |
| YE          | YH2    | 1 g/L yeast extract      |
| Arg         | YH2    | 1 g/L arginine           |
| Glu         | YH2    | 1 g/L glutamic acid      |
| 2Glu        | YH2    | 2 g/L glutamic acid      |
| Gly         | YH2    | 1 g/L glycine            |
| His         | YH2    | 1 g/L histidine          |
| Leu         | YH2    | 1 g/L leucine            |
| Phe         | YH2    | 1 g/L phenylalanine      |
| Tryp        | YH2    | 1 g/L tryptophan         |
| Tyr         | YH2    | 1 g/L tyrosine           |
| Val         | YH2    | 1 g/L valine             |
| 4MSG        | YH2    | 4 g/L MSG                |
| B1          | YH2    | 0.1 mg/L B1              |
| B2          | YH2    | 0.5 mg/L B2              |
| B3          | YH2    | 0.5 mg/L B3              |
| B6          | YH2    | 0.5 mg/L B6              |
| B7          | YH2    | 1.0 mg/L B7              |
| B9          | YH2    | 0.5 mg/L B9              |

Basal medim YH2: 2 g/L Hyponex 7-6-19 + 100 mg/L inositol + 3 g/L charcoal + 0.3 g/L B complex\* + 30 g/L glucose + 100 mg/L humic acid + 3.5 g/L gelrite, pH 5.6. Medium B1~B9 did not include B complex. B complex\*: A mixture of 34 mg B1(thiamine), 22 mg B2(riboflavin), 16 mg B3 (niacina-mide), 58 mg B5(pantothenic acid), 6 mg B6(pyridoxine), 35 mg B7 (biotin), 0.04 mg B9(folic acid), 37 mg inositol, 159 mg taurine, 39 mg choline bitartrate.

**Table S8.** Media with chitosan used for growth and proliferation of *G. elata* juvenile rhizomes.

| Medium Code | Basal Medium                                                                                         | Other Ingredient |
|-------------|------------------------------------------------------------------------------------------------------|------------------|
| YH3         | YH3                                                                                                  | -                |
| TM          | YM3 without 370 mg/L MgSO <sub>4</sub> ·7H <sub>2</sub> O & 170 mg/L KH <sub>2</sub> PO <sub>4</sub> | 1 g/L chitosan   |
| CHT1        | YH3                                                                                                  | 1 g/L chitosan   |
| CHT2        | YH3                                                                                                  | 2 g/L chitosan   |

YH3: 2 g/L Y + F nutrient. BA: 6-benzyladenine; IAA: indole-3-acetic acid; B6: pyridoxine; B9: folic acid.

**Table S9.** Effect of various basal salts on growth and proliferation of *G. elata* juvenile rhizomes.

| Medium Code | Basal Medium | Other Ingredient                                                                             |
|-------------|--------------|----------------------------------------------------------------------------------------------|
| Y1          | YH5          | 1 g/L Hyponex 7-6-19                                                                         |
| 1/2 AB      | YH5          | Only 1/2 amount of NH <sub>4</sub> NO <sub>3</sub> +KNO <sub>3</sub> in MS                   |
| Y1 + 1/2 AB | YH5          | 1 g/L Hyponex 7-6-19 + 1/2 amount of NH <sub>4</sub> NO <sub>3</sub> +KNO <sub>3</sub> in MS |

Basal medium YH5: F nutrient (tryptone 5 g) + 1 g/L chitosan + 1.5 g/L *A. mellea* powder + 100 mL/L coconut water + 2 mg/L BA + 2 mg/L NAA. 1/2 AB: MS salts with only 1/2 amount of NH<sub>4</sub>NO<sub>3</sub> (825 mg/L) and KNO<sub>3</sub> (950 mg/L) in original MS medium. BA: 6-benzyladenine; IAA: indole-3-acetic acid; B6: pyridoxine; B9: folic acid. 30 g/L glucose + 100 mg/L inositol + 100 mg/L humic acid + 3 g/L charcoal + 0.5 mg/L B6 + 0.5 mg/L B9 + 2 g/L tryptone + 2 g/L glutamic acid + MSs\* + 3.5 g/L gelrite, pH5.6).
